# Supplementary material
Source: HighWire-hosted journal article supplement (https://tobaccocontrol.bmj.com/content/26/6/629)
Supplement: inline-supplementary-material-1 [file inline-supplementary-material-1.pdf]

**Supplementary File 1: BATNZ Agree-Disagree Media Schedule AND Target Audience rating points**

| <b>TVC</b>              | <b>Date (2012)</b> | <b>TARP</b>    | <b>Cume.*<br/>Reach%**</b> | <b>Reach%<br/>2+***</b> | <b>Reach%<br/>3+****</b> |
|-------------------------|--------------------|----------------|----------------------------|-------------------------|--------------------------|
| Intellectual Property   | 22 Aug             | 536.9          | 77.1                       | 68.3                    | 58.7                     |
| International Trade     | 2 Sept             | 421.4          | 76.4                       | 62.9                    | 51.7                     |
| Australian Laws         | 16 Sept            | 534.8          | 77.3                       | 66.6                    | 59.2                     |
| Personal Responsibility | 30 Sept            | 467.6          | 76.1                       | 63.4                    | 51.5                     |
| What's next?            | 14 Oct             | 416.4          | 71.7                       | 59.4                    | 49.6                     |
| <b>TOTAL</b>            |                    | <b>2,377.0</b> | <b>92.8</b>                | 88.8                    | 86.2                     |

n=588

\* Cumulative reach

\*\*95% margin of error 2.1%

\*\*\* 95% margin of error 2.5%

\*\*\*\* 95% margin of error 2.8%

**Source:** AGB Nielsen PeopleMeter (analysis conducted by GSL Network).
